# Supplementary material for: DNA and BSA binding and cytotoxic properties of copper(ii) and iron(iii) complexes with arylhydrazone of ethyl 2-cyanoacetate or formazan ligands
Source: Royal Society of Chemistry journal article supplement (doi:10.1039/c7nj00420f), 2017-01-01
Supplement: c7nj00420f1.pdf [file c7nj00420f1.pdf]

## Electronic Supplementary Information

### DNA, BSA binding and cytotoxic properties of copper(II) and iron(III) complexes with arylhydrazone of ethyl 2-cyanoacetate or formazan ligands

Nuno M. R. Martins,<sup>a</sup> Sellamuthu Anbu,<sup>\*a</sup> Kamran T. Mahmudov,<sup>\*a,b,c</sup> Rajendran  
Ravishankaran,<sup>d</sup> M. Fátima C. Guedes da Silva,<sup>a</sup> Luísa M. D. R. S. Martins,<sup>a,e</sup>  
Anjali A. Karande,<sup>d</sup> Armando J. L. Pombeiro<sup>\*a</sup>

<sup>a</sup> Centro de Química Estrutural, Instituto Superior Técnico, Universidade de Lisboa, Av. Rovisco Pais, 1049-001 Lisbon, Portugal

<sup>b</sup> Department of Chemistry, Baku State University, Z. Xalilov Str. 23, Az 1148 Baku, Azerbaijan

<sup>c</sup> Organic Chemistry Department, RUDN University, 6 Miklukho-Maklaya str., Moscow 117198, Russian Federation

<sup>d</sup> Department of Biochemistry, Indian Institute of Science, Bangalore-560 012, India

<sup>e</sup> Chemical Engineering Department, ISEL, R. Conselheiro Emídio Navarro, 1959-007 Lisboa, Portugal

\*Corresponding authors. Phone: +351 218419237.

E-mail addresses: [bioinorg\\_anbu@yahoo.com](mailto:bioinorg_anbu@yahoo.com) (S. Anbu)

[kamran\\_chem@yahoo.com](mailto:kamran_chem@yahoo.com), [kamran\\_chem@mail.ru](mailto:kamran_chem@mail.ru) (K.T. Mahmudov),

[pombeiro@tecnico.ulisboa.pt](mailto:pombeiro@tecnico.ulisboa.pt) (A.J.L. Pombeiro).

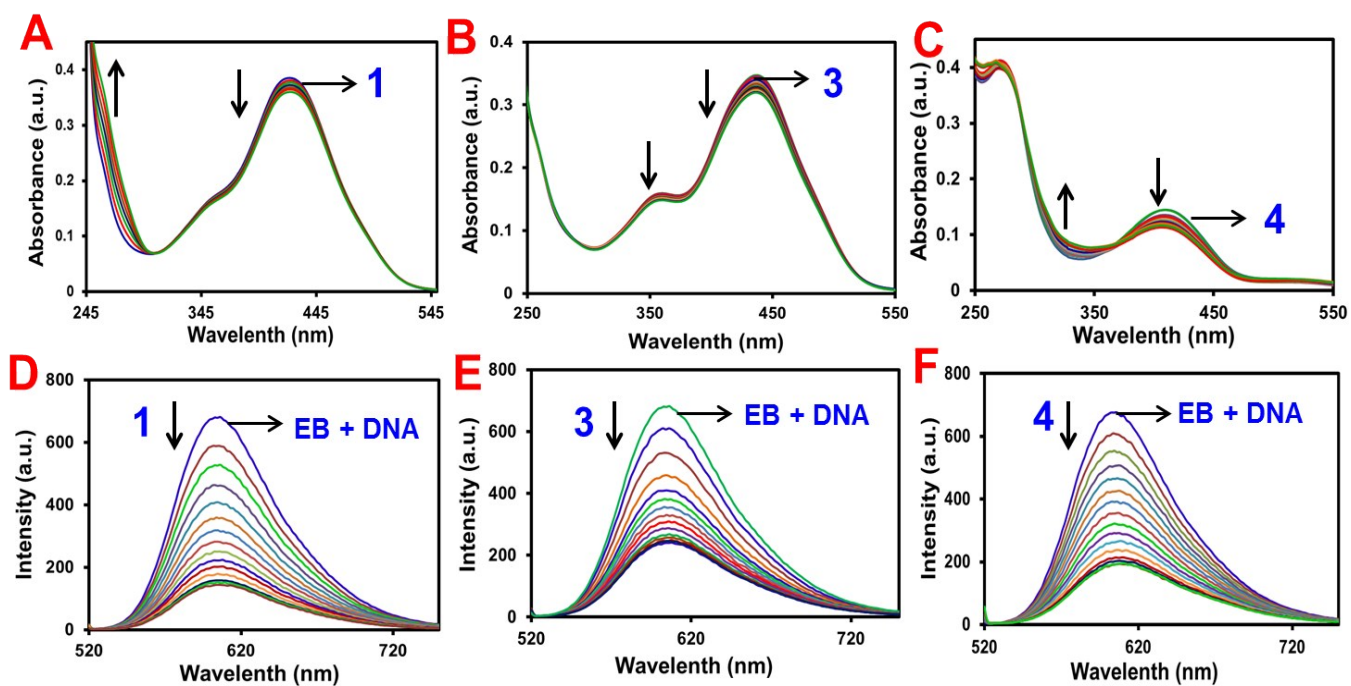

**Figure S1.** (A-C) Absorption spectra of the complexes **1**, **3** and **4** ( $1 \times 10^{-5}$  M) in the absence and presence of increasing amounts of CT DNA ( $0-25 \times 10^{-6}$  M) at 25 °C in 5 mM Tris-HCl/50 mM NaCl buffer (pH = 7.5). Arrow shows the absorbance changing upon increasing DNA concentrations. (D-F) Emission spectra of EB bound to DNA in the presence of the complexes **1**, **3** and **4** ( $[EB] = 3.3 \mu\text{M}$ ,  $[DNA] = 40 \mu\text{M}$ ,  $[\text{complex}] = 0-250 \mu\text{M}$ ,  $\lambda_{\text{ex}} = 510 \text{ nm}$ ). Arrow shows the emissions changing upon increasing complex concentrations.

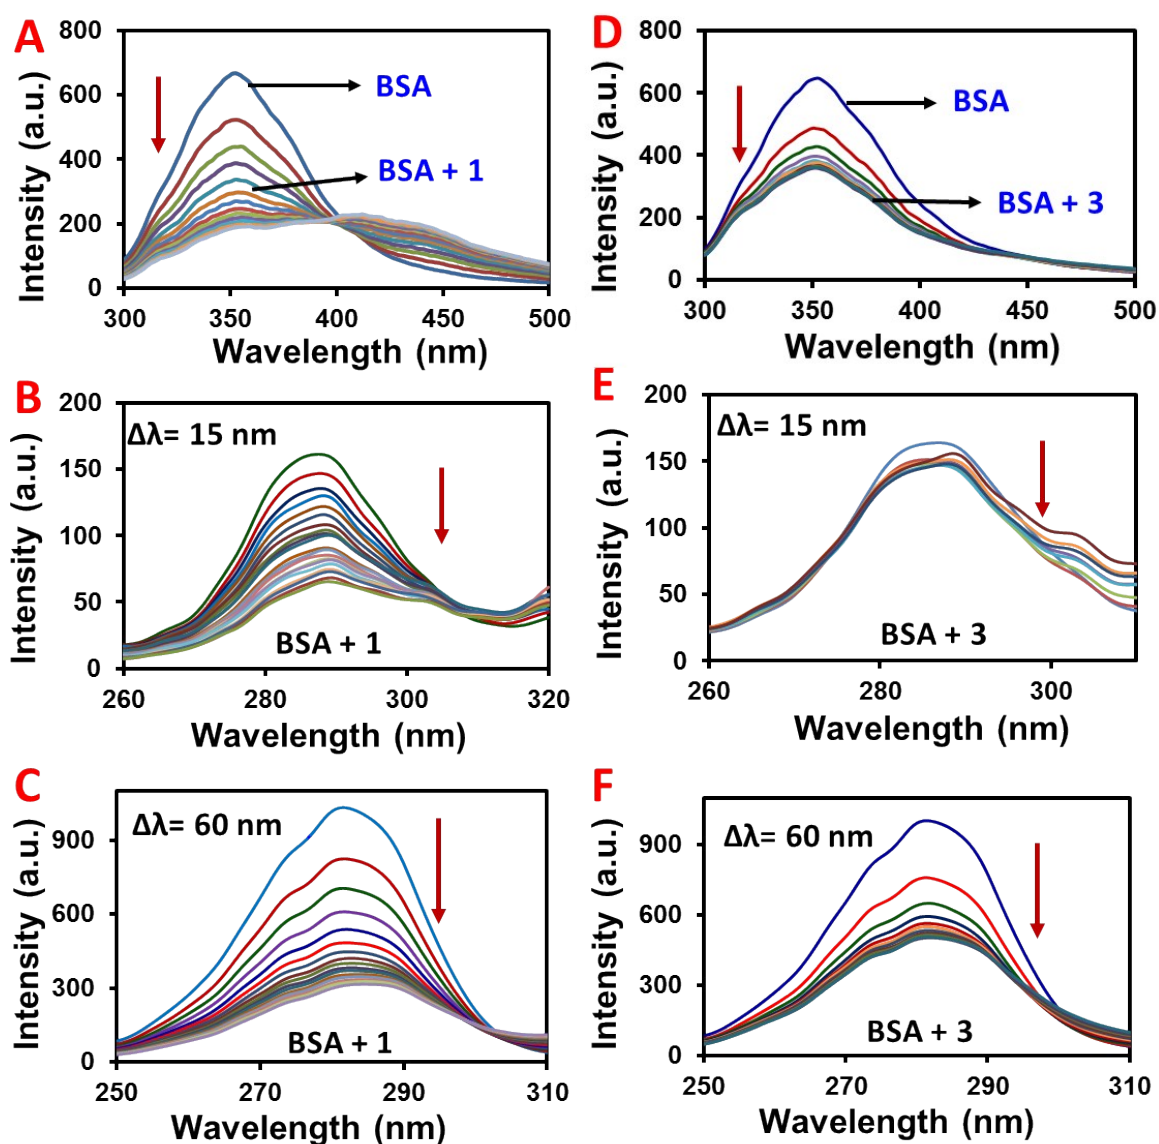

**Figure S2.** (A-B) The inner filter effect corrected emission spectrum of BSA ( $1 \times 10^{-6}$  M;  $\lambda_{\text{ex}} = 285$  nm;  $\lambda_{\text{em}} = 346$ ) in the presence of increasing amounts of the complexes **1** (A) and **3** (D) ( $0-5 \times 10^{-6}$  M). (B, C, E and F) Synchronous spectra of BSA (5 mM Tris-HCl/50 mM NaCl buffer, pH = 7.5), in the presence of complexes **1** and **3** in increasing amounts ( $0-50 \mu\text{M}$ ), with wavelength difference of (B, C)  $\Delta\lambda = 15$  nm (E, F)  $\Delta\lambda = 60$  nm. Arrows show the emission intensity decrease upon increasing the concentration.
